# Supplementary material for: Modelling SARS-CoV-2 Binding Antibody Waning 8 Months after BNT162b2 Vaccination
Source: MDPI journal article supplement (doi:10.3390/vaccines10020285), 2022-02-13
Supplement: s1 [file s1]

# “Modelling SARS-CoV-2 Binding Antibody Waning 8 Months after BNT162B2 Vaccination” – Hatzakis et al.

Table S1. Intervals among two vaccines doses and the four measurements.

| Covariate                                                  | N = 97<br>Median (25 <sup>th</sup> – 75 <sup>th</sup> )<br>(days) |
|------------------------------------------------------------|-------------------------------------------------------------------|
| Interval between first and second dose of COVID-19 vaccine | 21 (21 – 22)                                                      |
| Interval between first dose of COVID-19 vaccine and        |                                                                   |
| first measurement                                          | 30 (29 – 32)                                                      |
| second measurement                                         | 125 (124 – 126)                                                   |
| third measurement                                          | 183 (182 – 185)                                                   |
| fourth measurement                                         | 251 (250 – 252)                                                   |
| Interval between second dose of COVID-19 vaccine and       |                                                                   |
| first measurement                                          | 9 (8 – 10)                                                        |
| second measurement                                         | 103 (102 – 105)                                                   |
| third measurement                                          | 161 (160 – 163)                                                   |
| fourth measurement                                         | 229 (228 – 231)                                                   |

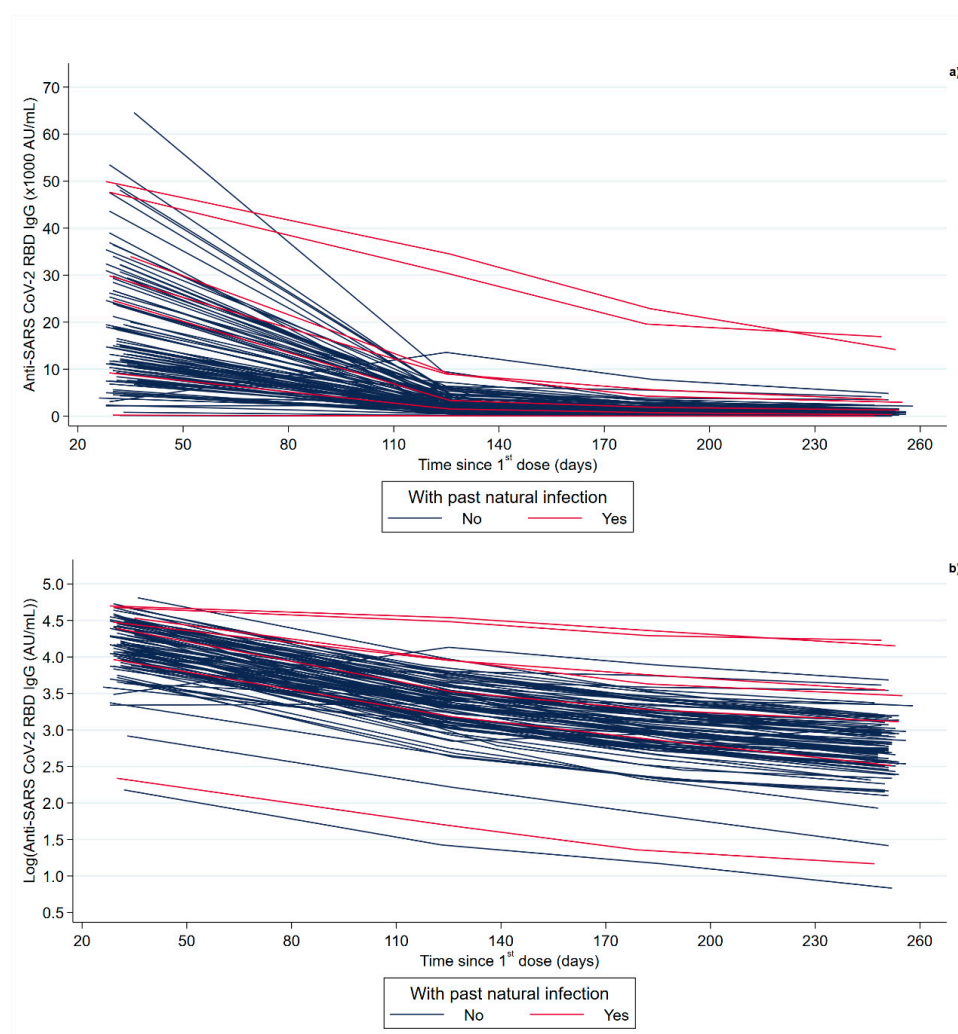

**Figure S1.** Anti-SARS-CoV-2 RBD IgG antibody levels in (a) Normal scale and (b) Logarithmic scale, among four-time points per individual. The black color indicates those without past natural infection (N = 90), while the red color indicates those with past natural infection (N = 7).
